# Supplementary figures and images for: Characterization of memory T cell subsets and common γ−chain cytokines in convalescent COVID‐19 individuals
Source: PubMed Central journal article supplement — J Leukoc Biol. 2022 Mar 8;112(1):201–12. doi: 10.1002/JLB.5COVA0721-392RR (PMC9088480; doi:10.1002/jlb.5cova0721-392rr), 2022-03-08

Suppl. Figure.4

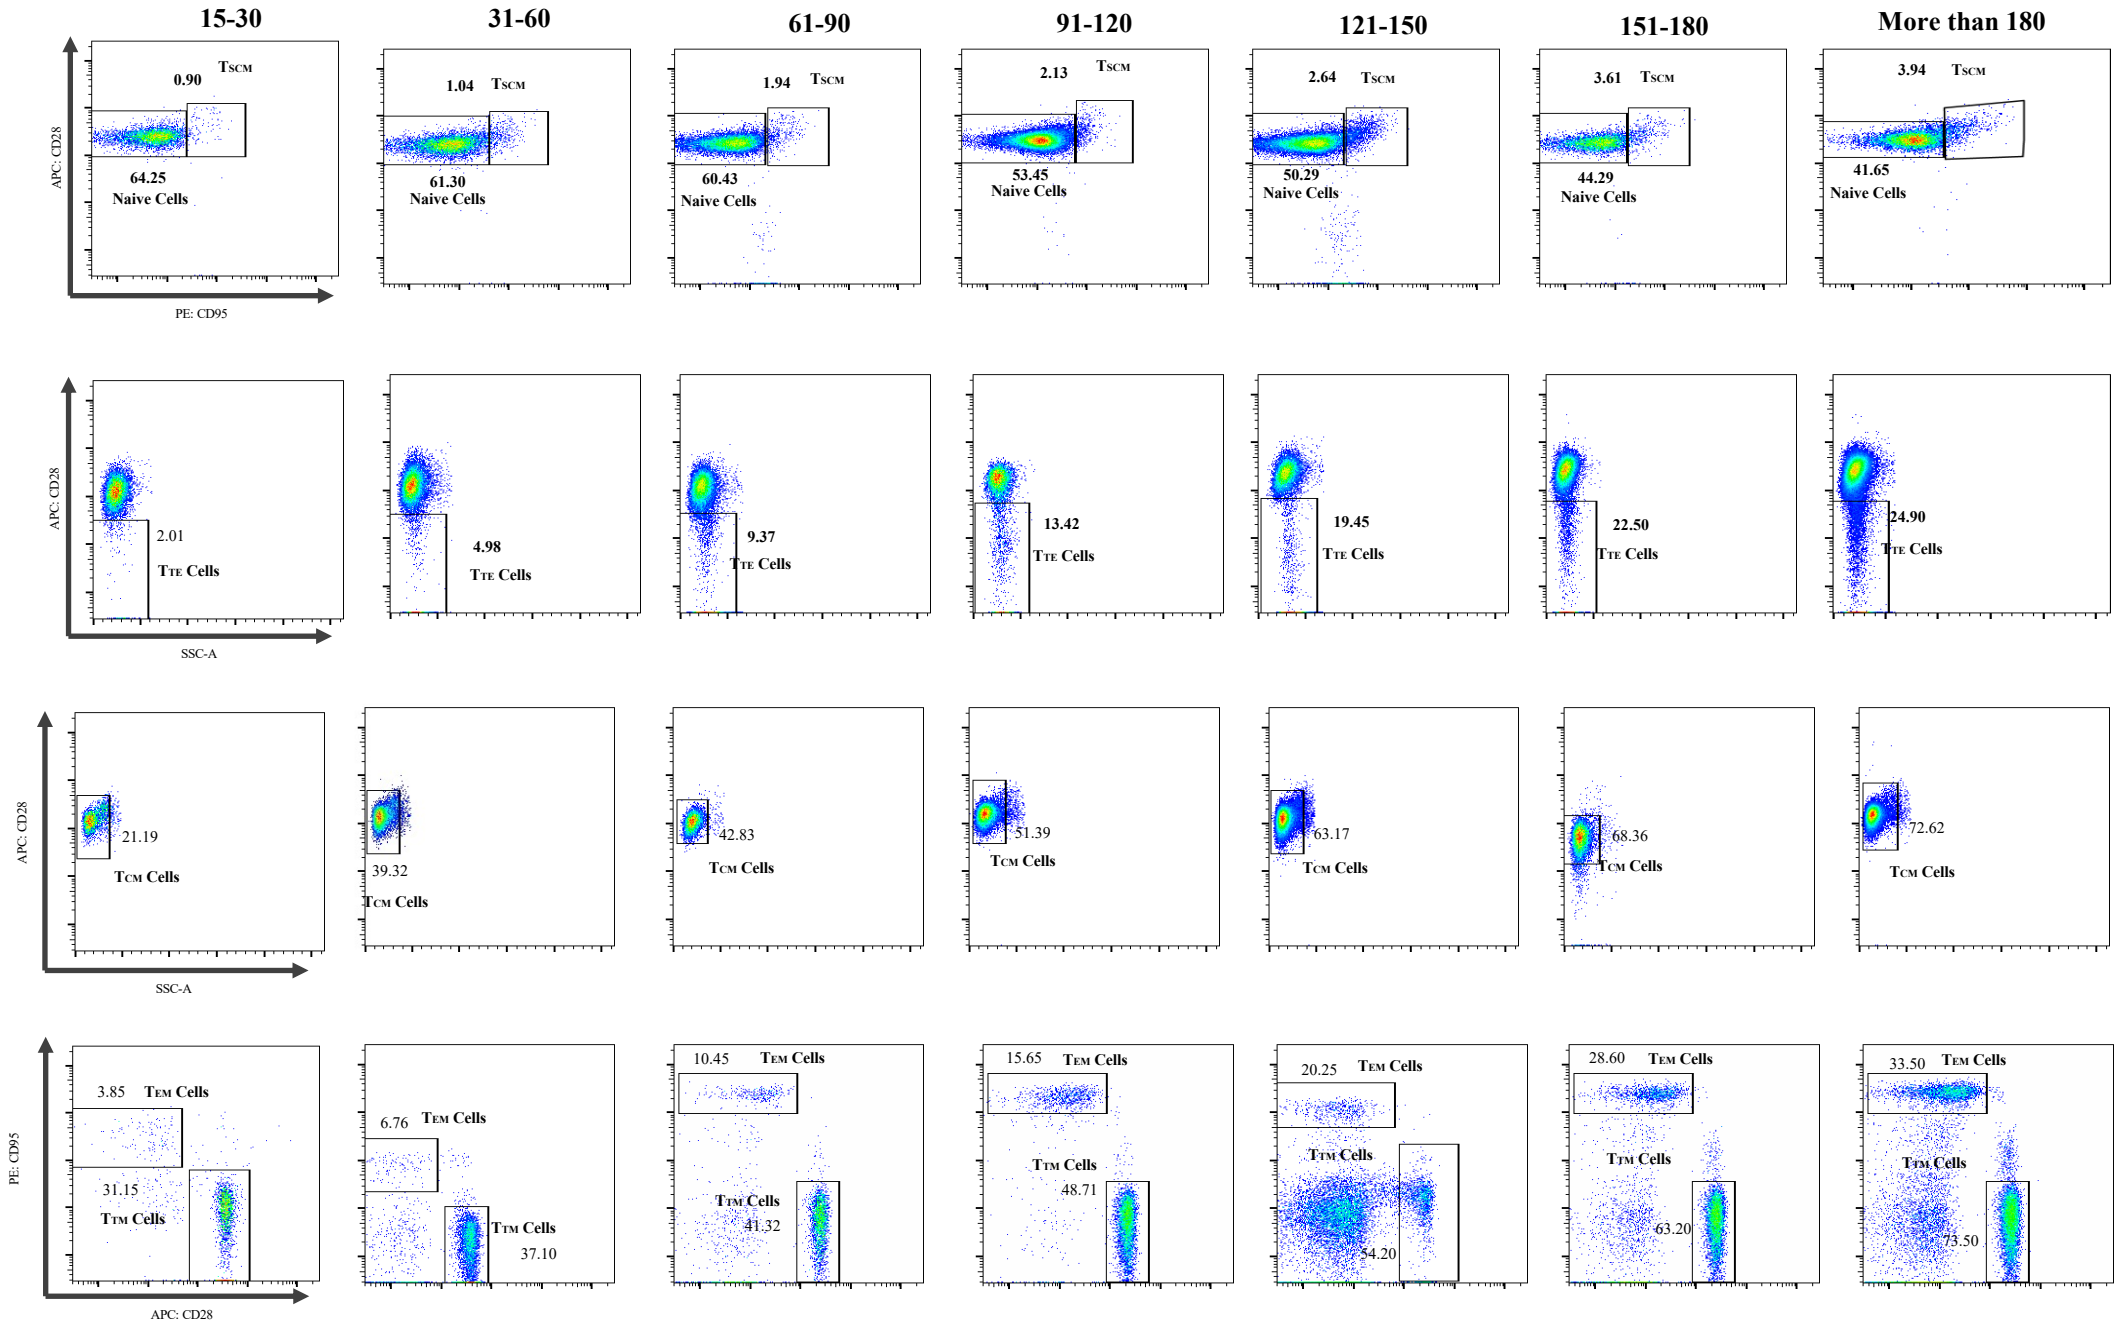

Supplement: JLB-112-201-s002.pdf [file JLB-112-201-s002.pdf]

Suppl. Figure.1

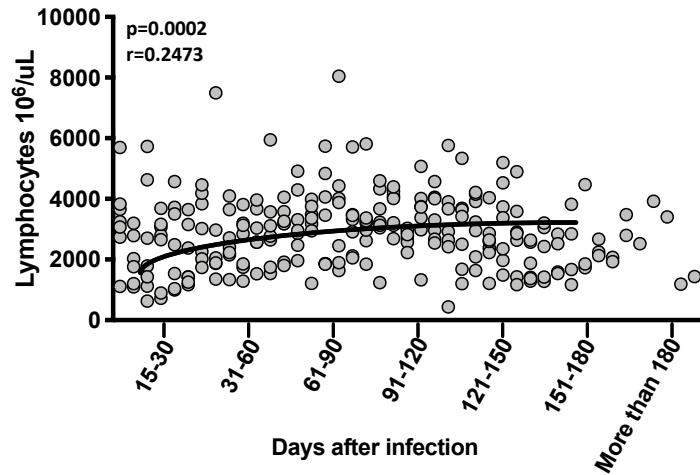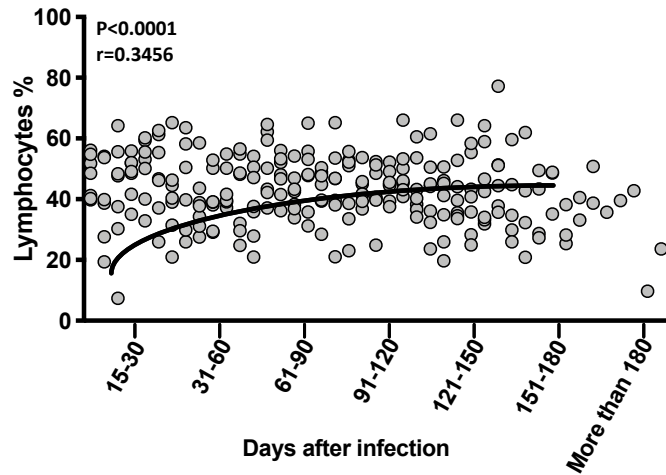

Supplement: JLB-112-201-s003.pdf [file JLB-112-201-s003.pdf]

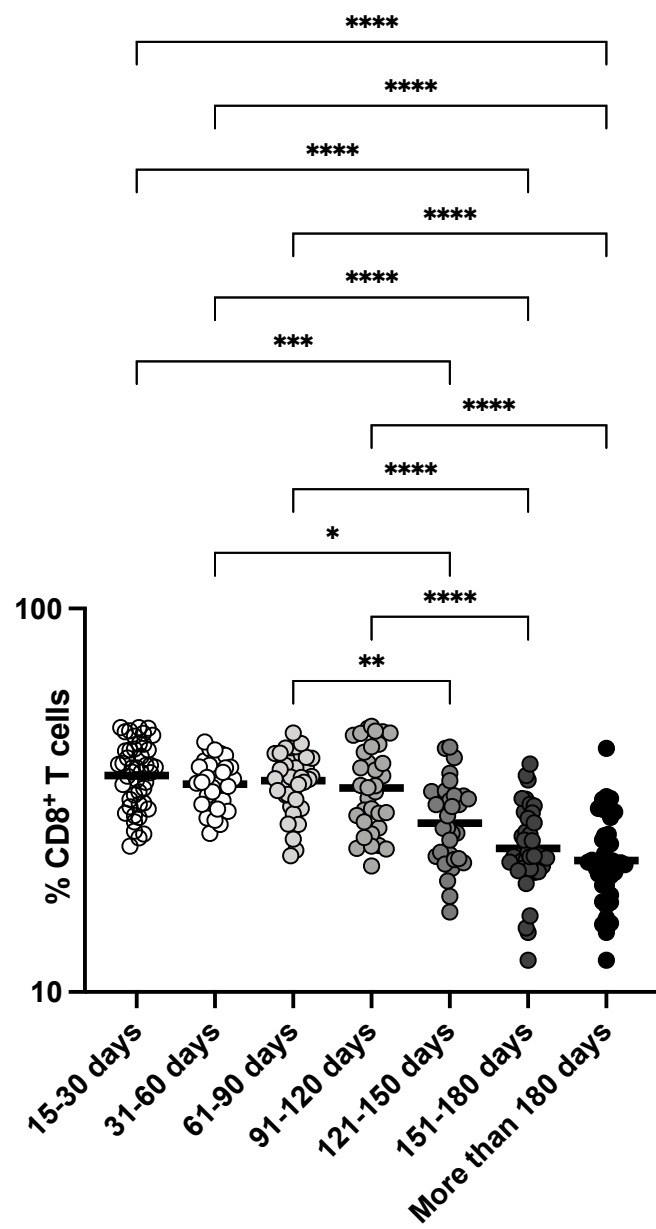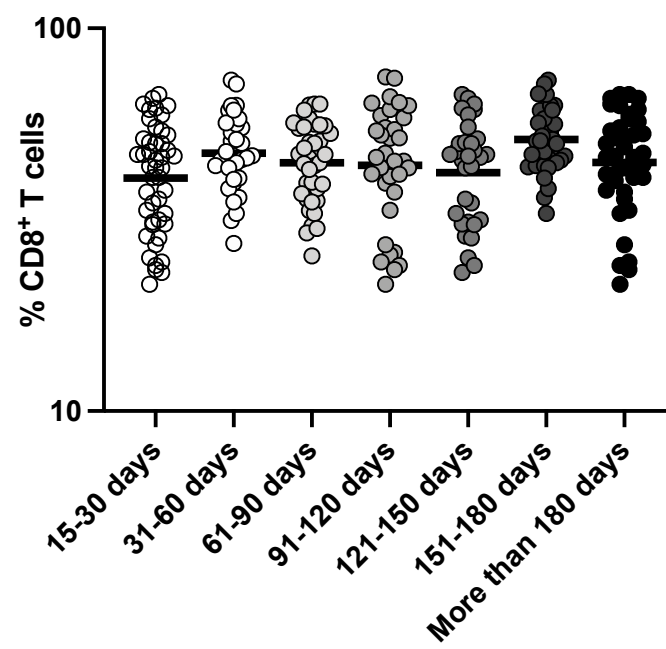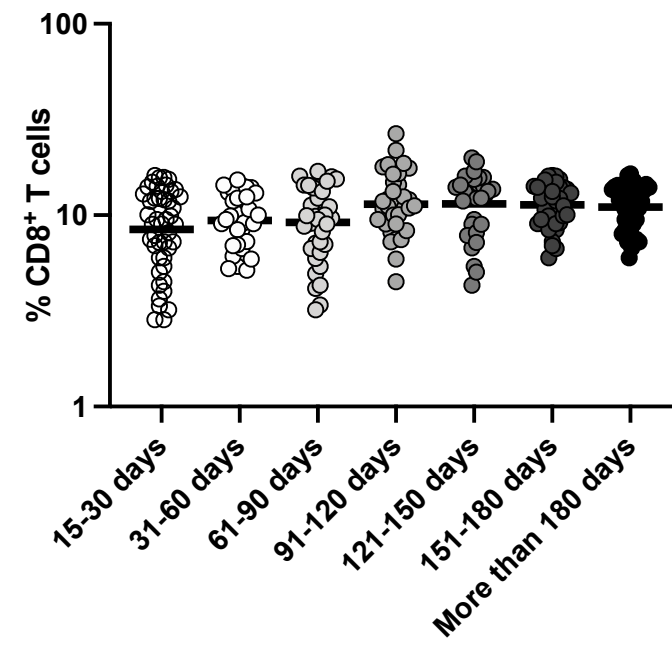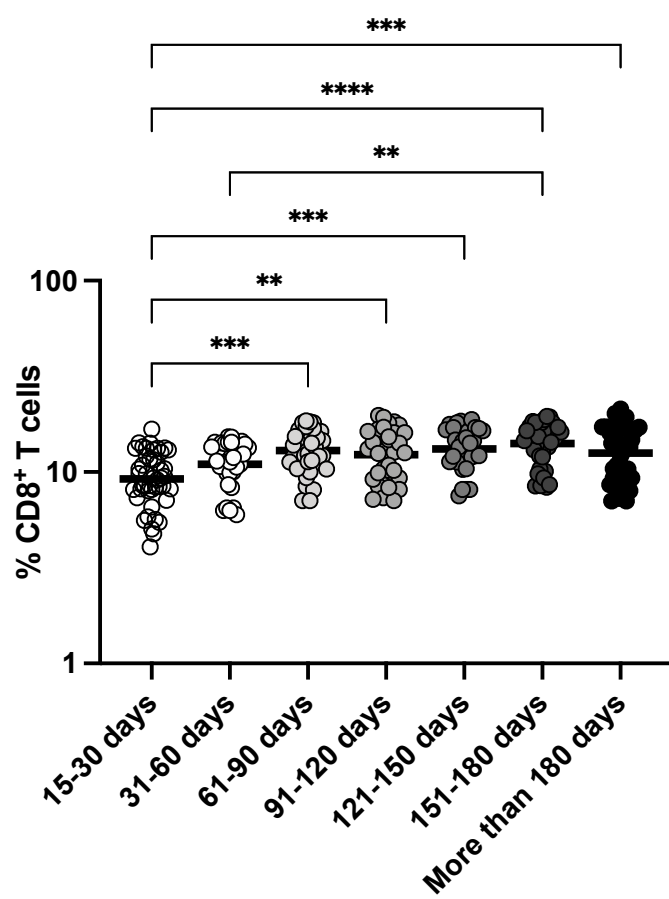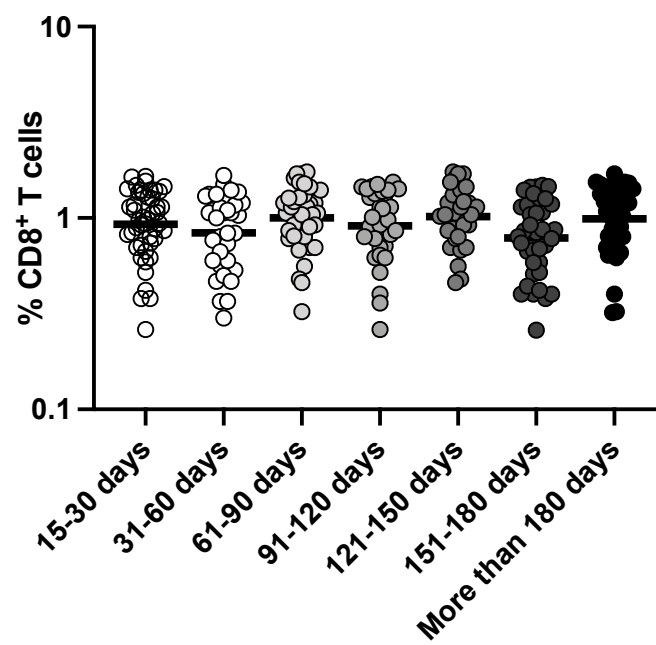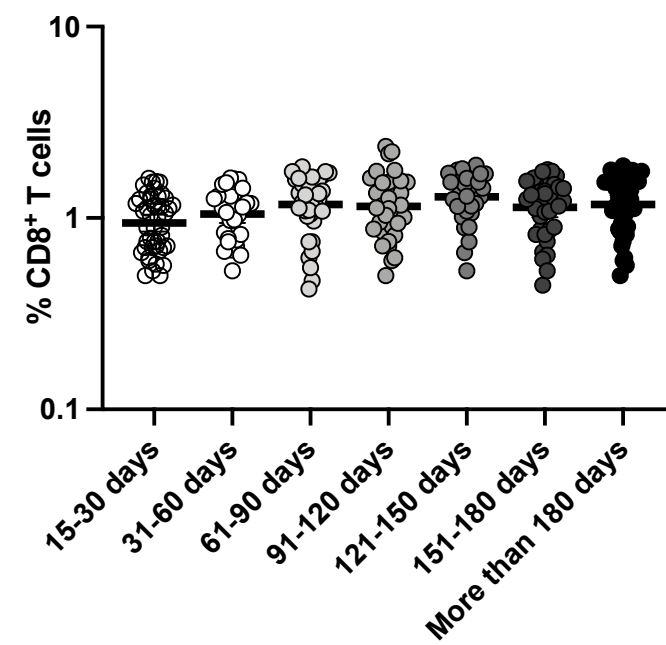

Supplement: JLB-112-201-s004.pdf [file JLB-112-201-s004.pdf]

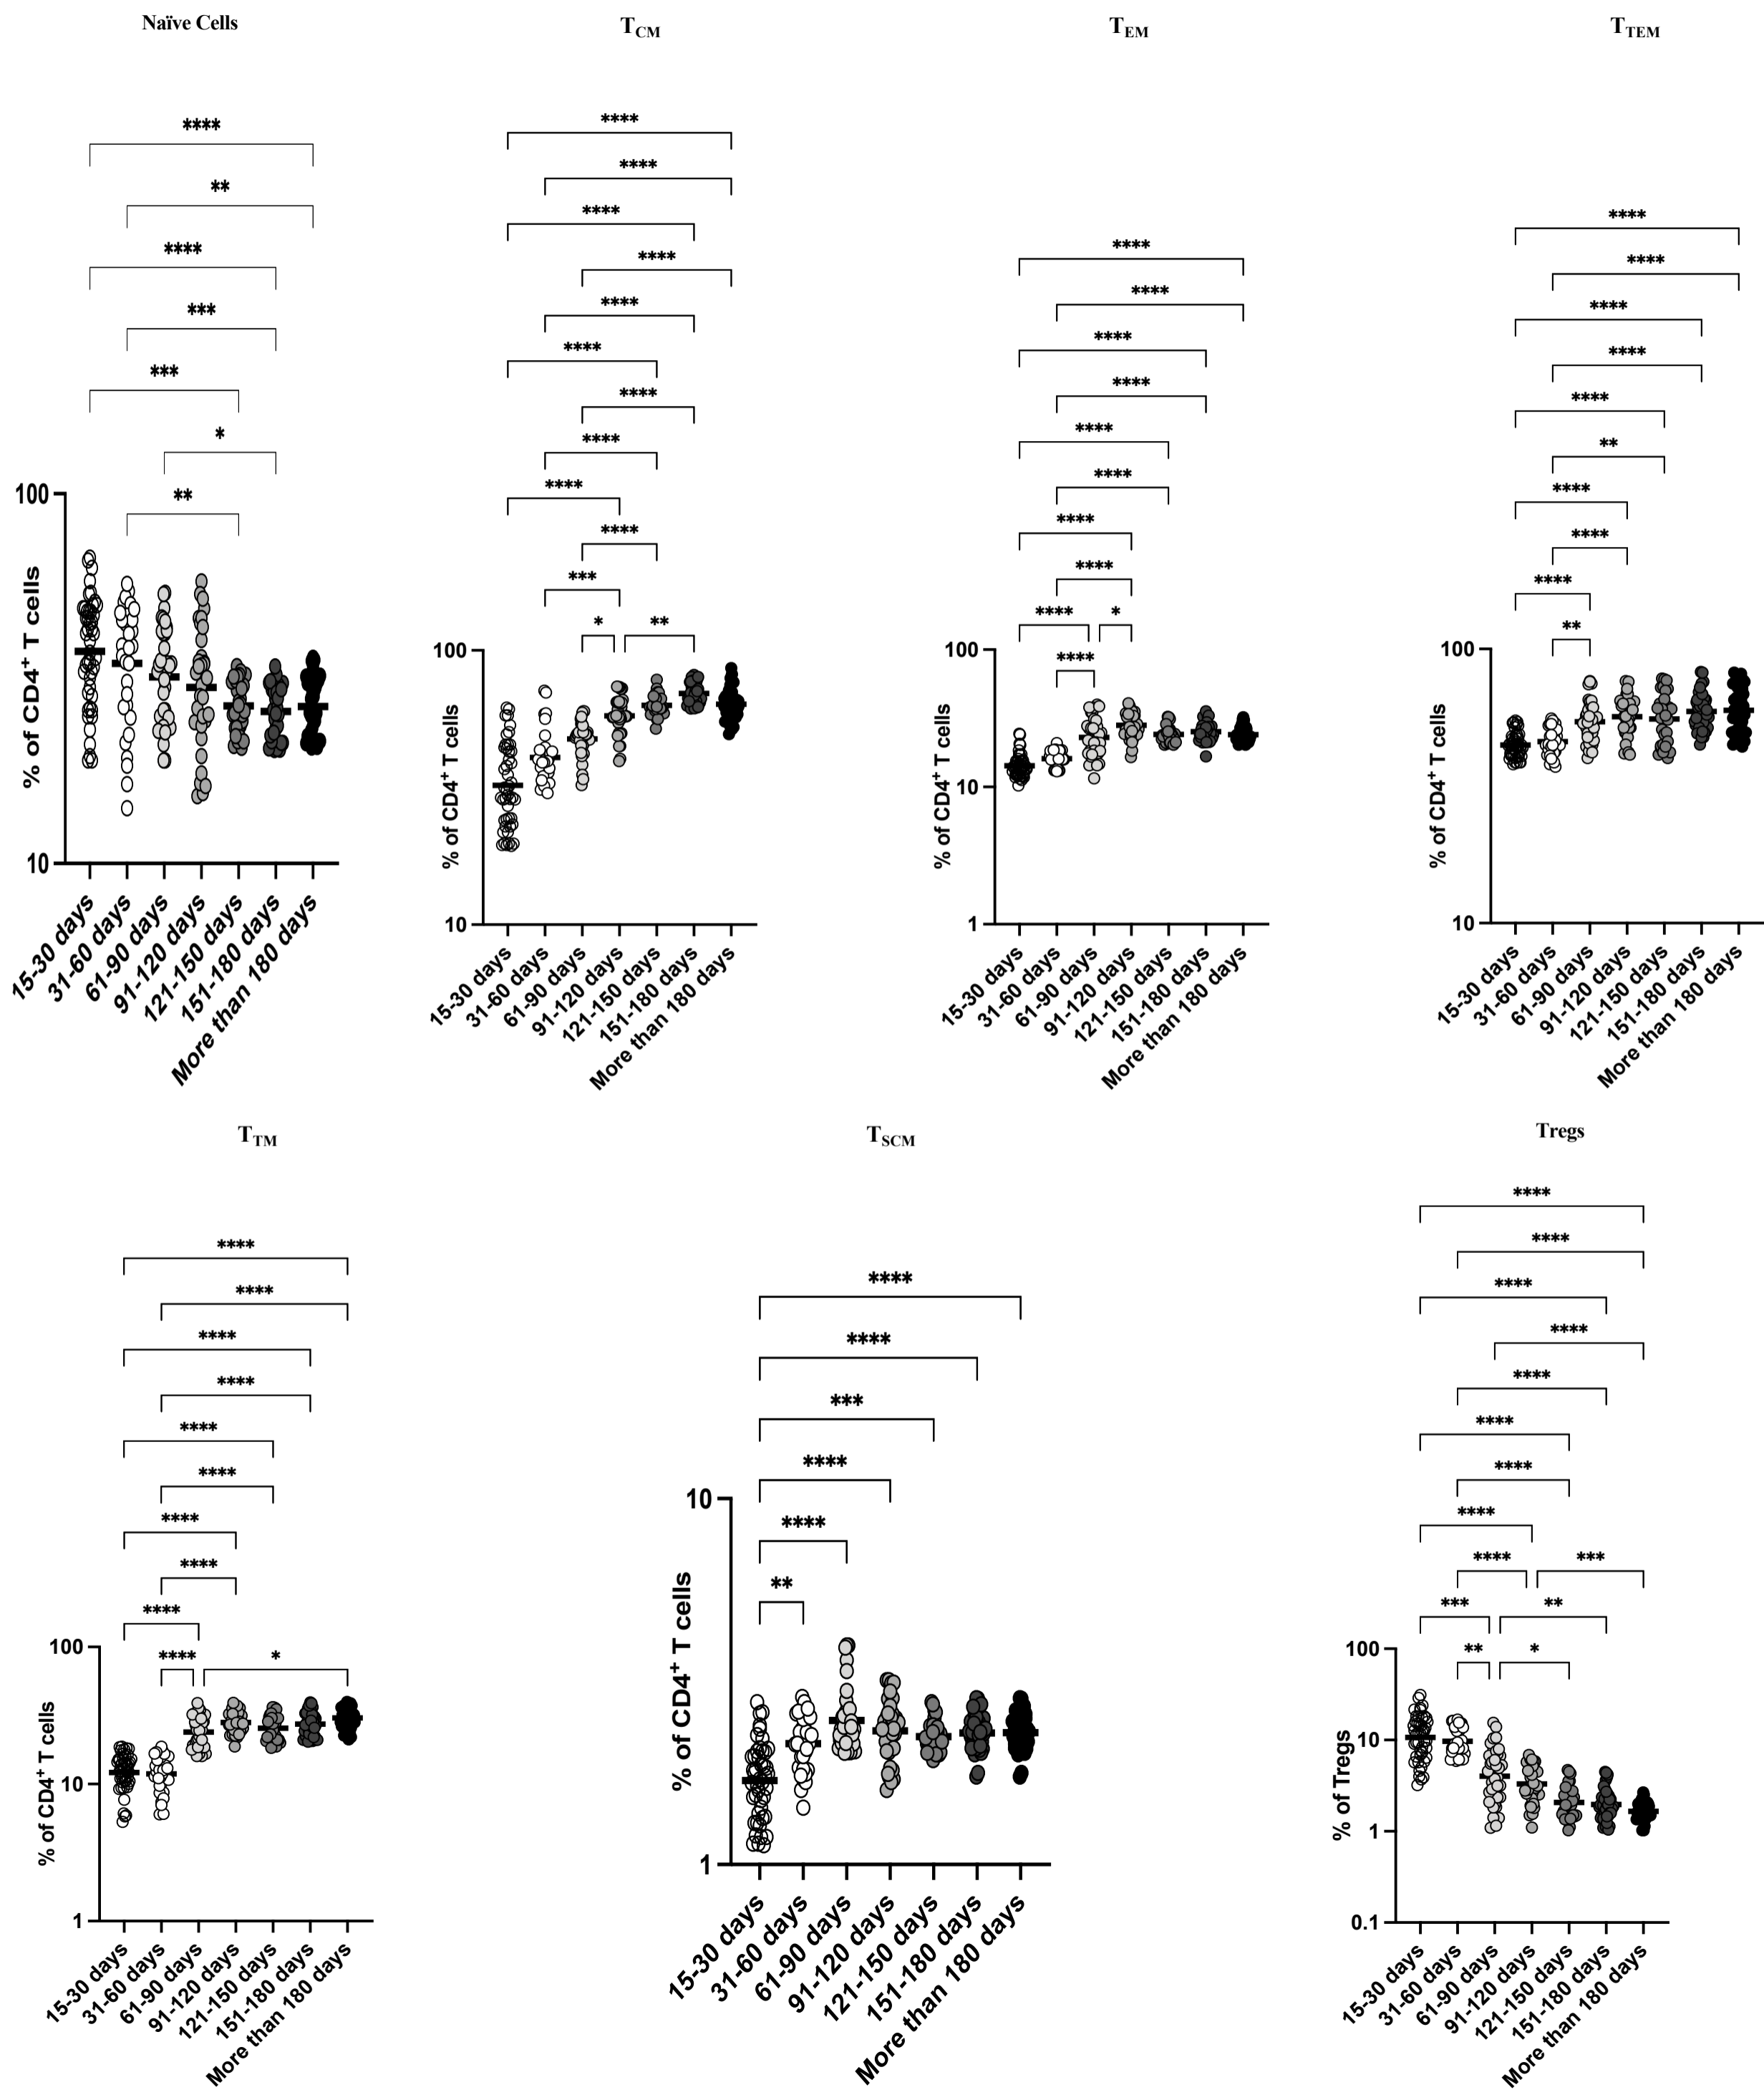

Supplement: JLB-112-201-s005.pdf [file JLB-112-201-s005.pdf]

Suppl. Figure.2

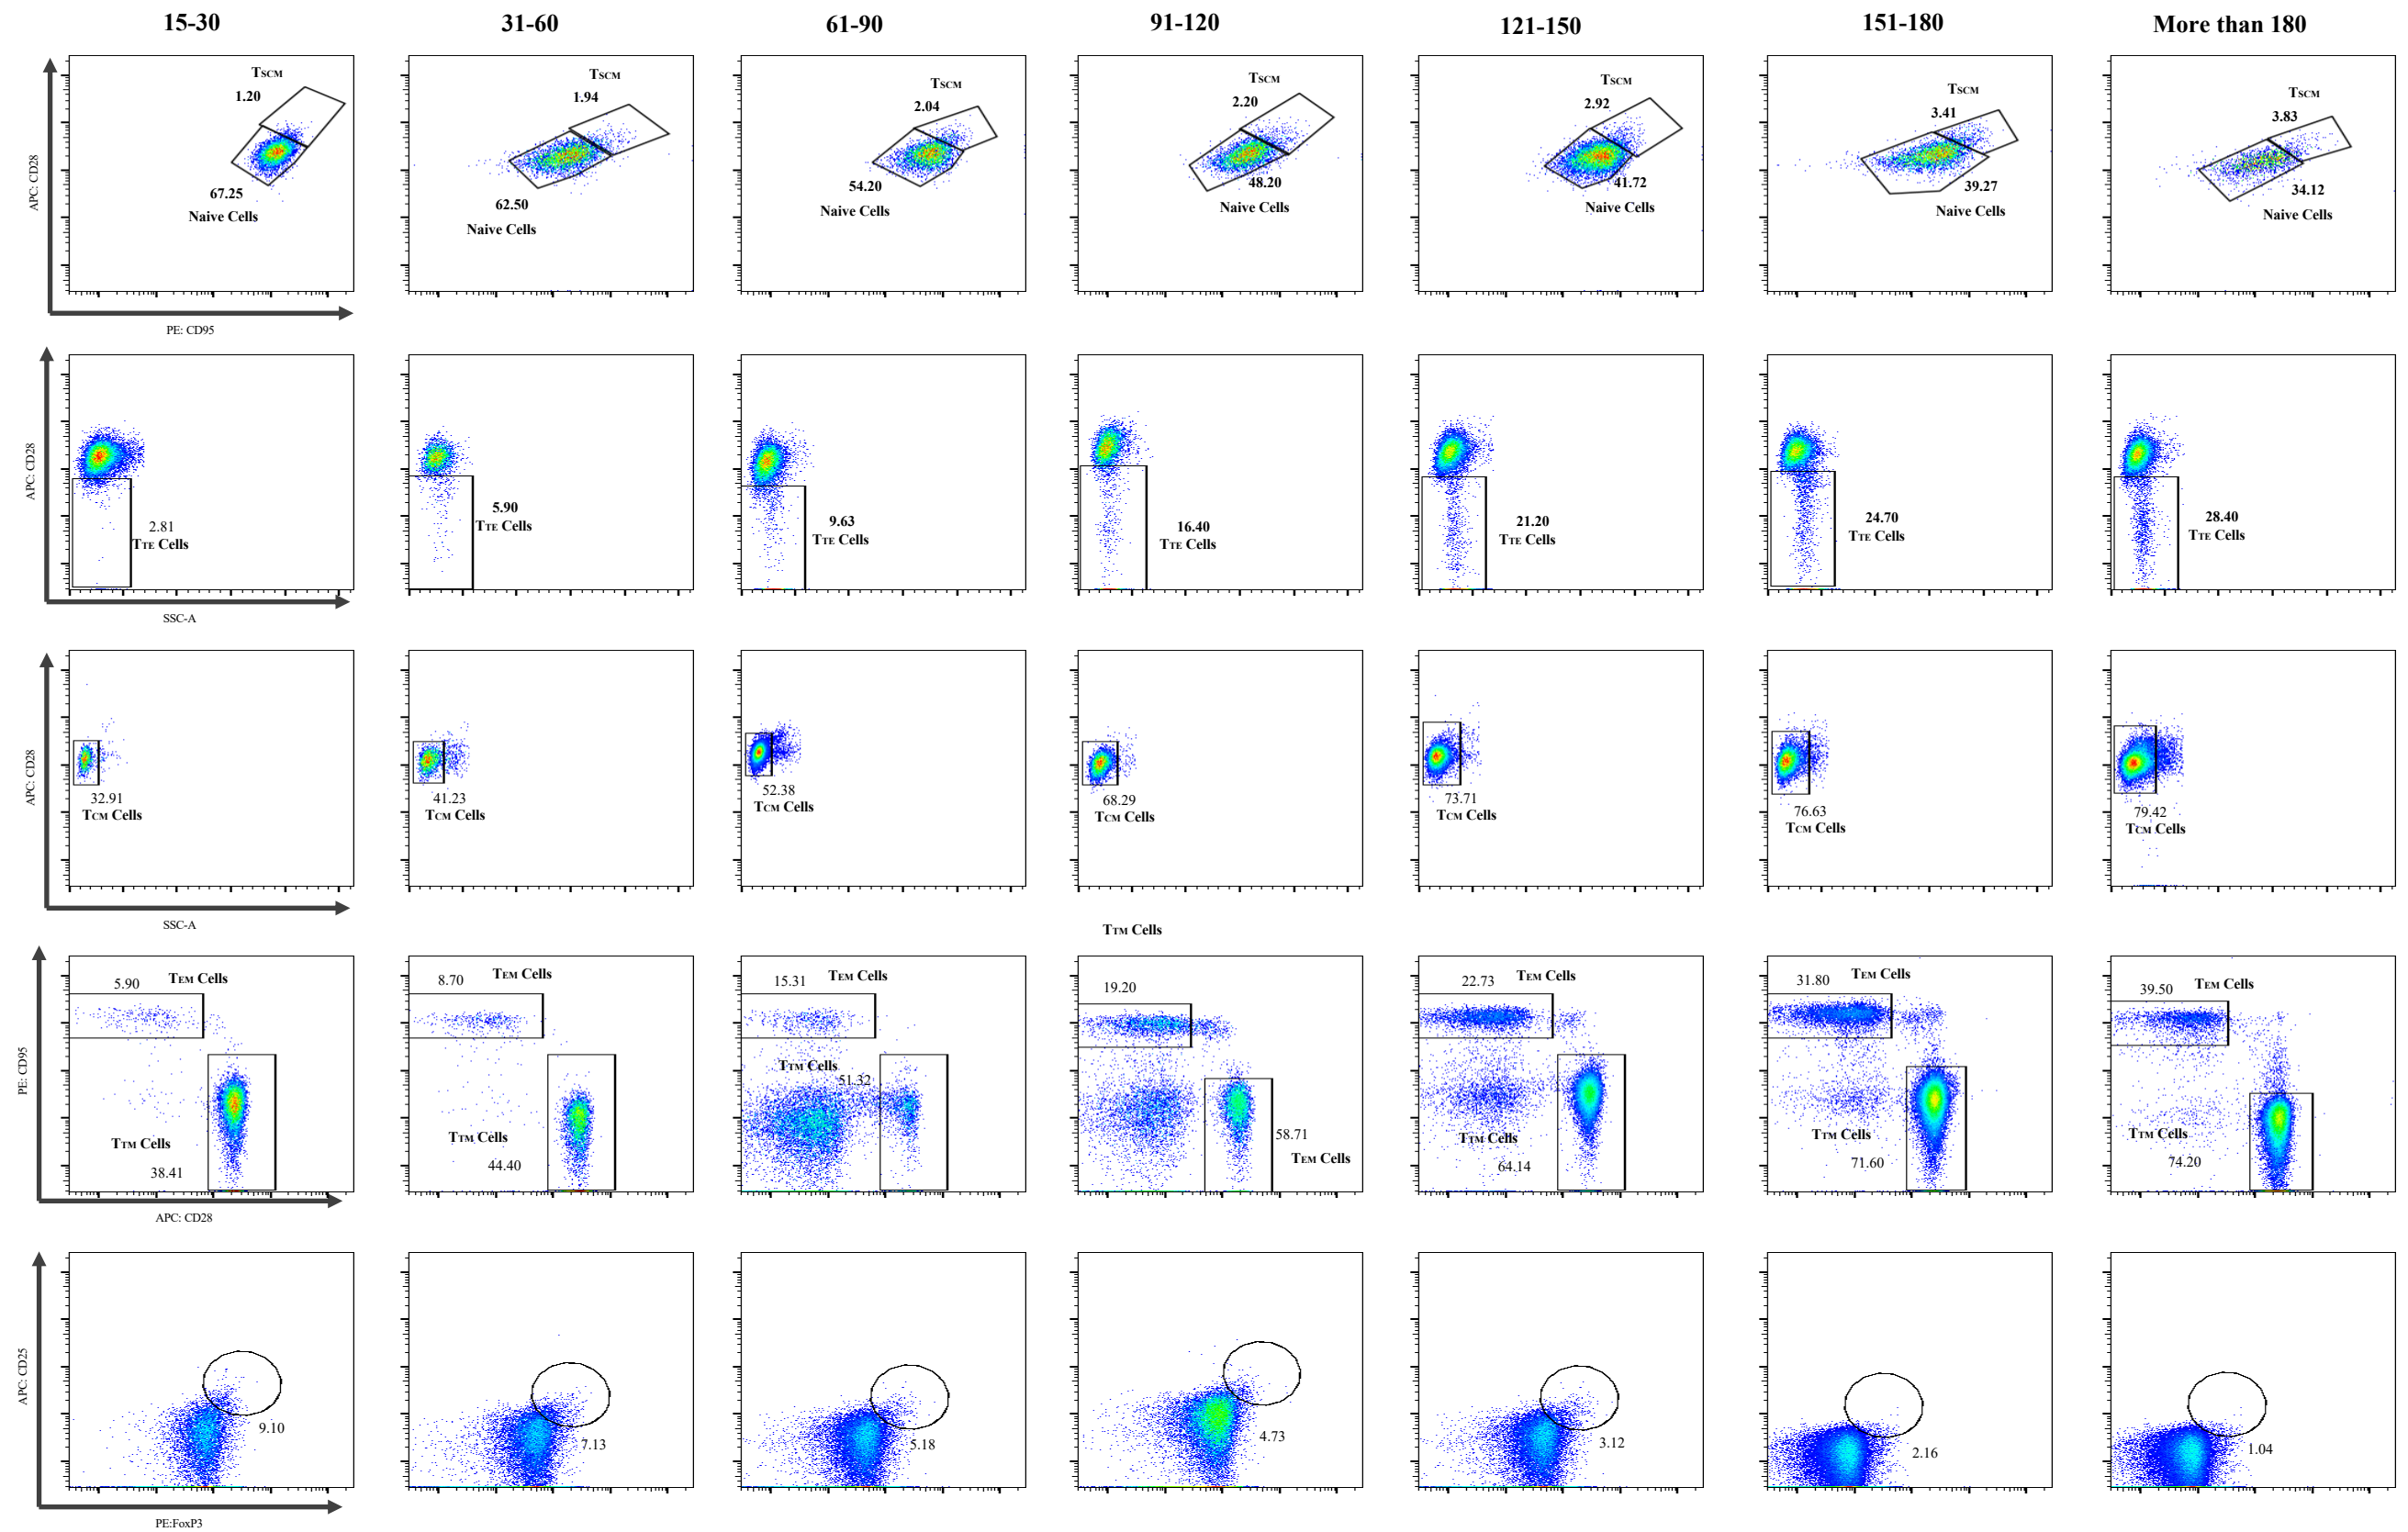

Supplement: JLB-112-201-s006.pdf [file JLB-112-201-s006.pdf]
